# Supplementary material for: Synthesis and Properties of Shape-Stabilized Phase Change Materials Based on Poly(triallyl isocyanurate-silicone)/n-Octadecane Composites
Source: PubMed Central journal article supplement — ACS Omega. 2022 Apr 21;7(17):14952–60. doi: 10.1021/acsomega.2c00604 (PMC9089381; doi:10.1021/acsomega.2c00604), 2022-04-21
Supplement: ao2c00604_si_001.pdf [file ao2c00604_si_001.pdf]

## Supporting Information

### Synthesis and Properties of Shape-Stabilized Phase Change Materials Based on Poly(Triallyl Isocyanurate-Silicone)/*n*- Octadecane Composites

Xi Chen,<sup>†,§</sup> Xuelin Huang,<sup>†,§</sup> Tong-Yu Shi,<sup>†,‡</sup> Jia-Xin Wang,<sup>†,‡</sup> Xin-Ru Yuan,<sup>†,‡</sup> Hao Huang,<sup>†</sup> Jiahong Wang,<sup>†,‡</sup> Rui He,<sup>\*,†</sup> and Xue-Feng Yu<sup>†,‡</sup>

<sup>†</sup>Shenzhen Institutes of Advanced Technology, Chinese Academy of Sciences, Shenzhen 518055, China

<sup>‡</sup>University of Chinese Academy of Sciences, Beijing 100049, China

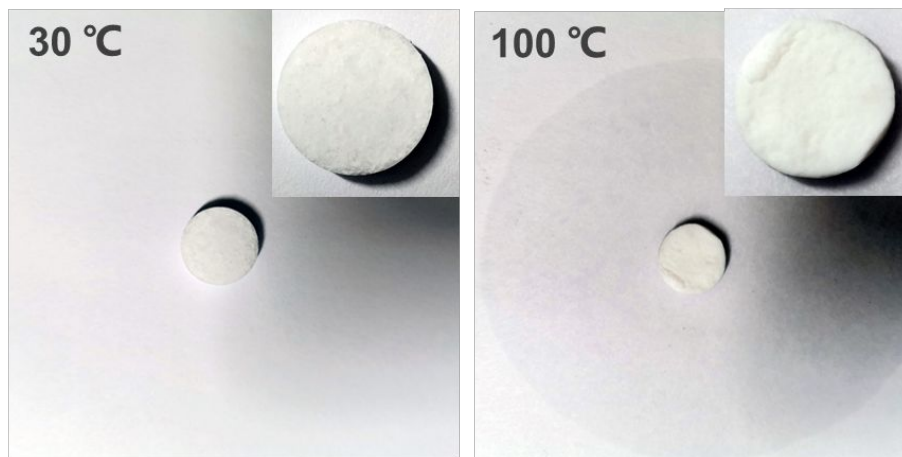

**Figure S1.** Macrographs of the TO composite during the thermal shape stability test.

**Note: Preparation of the TAIC/*n*-octadecane (TO) composite**

16 g TAIC and 16 g *n*-octadecane were mixed uniformly with stirring in a three-neck round bottomed flask. Then, BPO (2 % of the mixture weight) was added into the flask and the mixture was stirred at 110 °C for 30 min to obtain TAIC/*n*-octadecane composite.

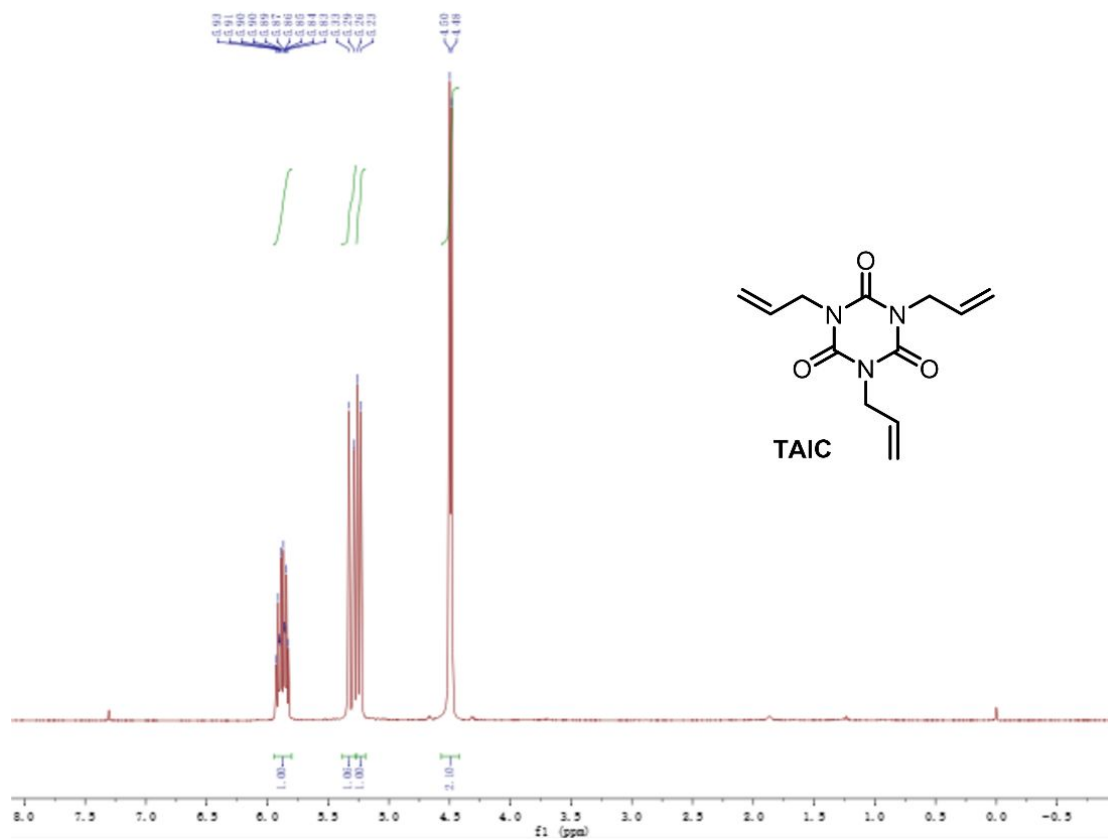

**Figure S2.** <sup>1</sup>H NMR spectrum of TAIC.

<sup>1</sup>H NMR (400 MHz, CDCl<sub>3</sub>) δ 5.88 (ddt, J = 17.0, 10.4, 6.0 Hz, 1H), 5.31 (d, J = 17.0 Hz, 1H), 5.24 (d, J = 10.4 Hz, 1H), 4.49 (d, J = 6.0 Hz, 2H).

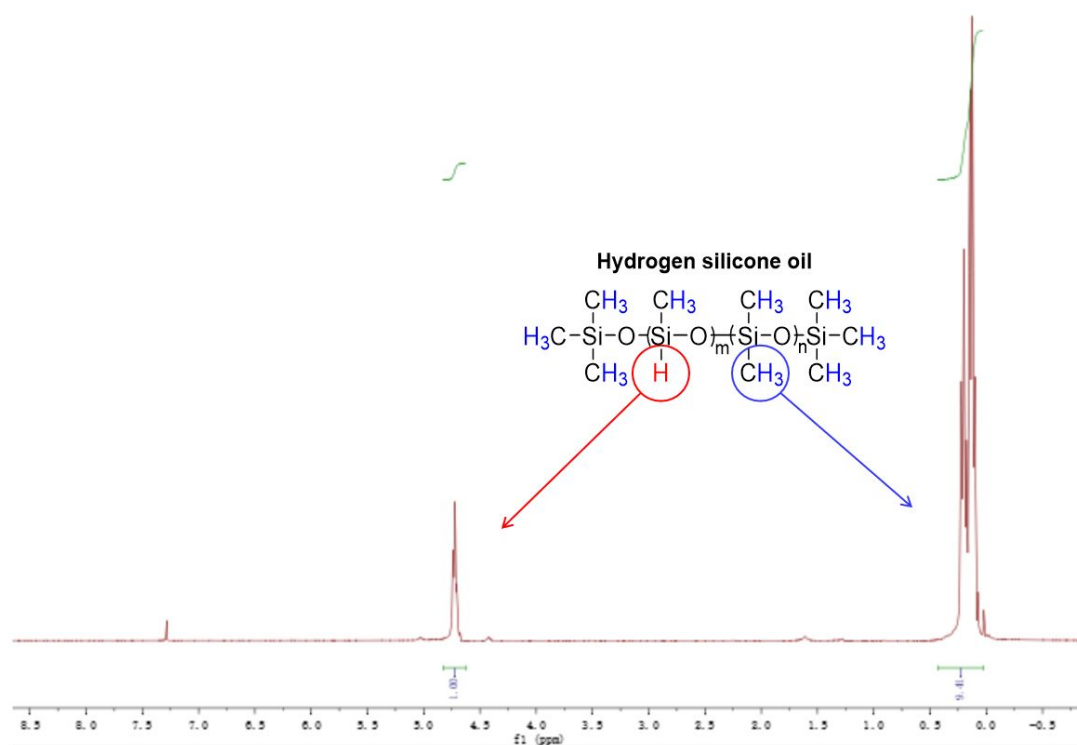

**Figure S3.**  $^1\text{H}$  NMR spectrum of SO.

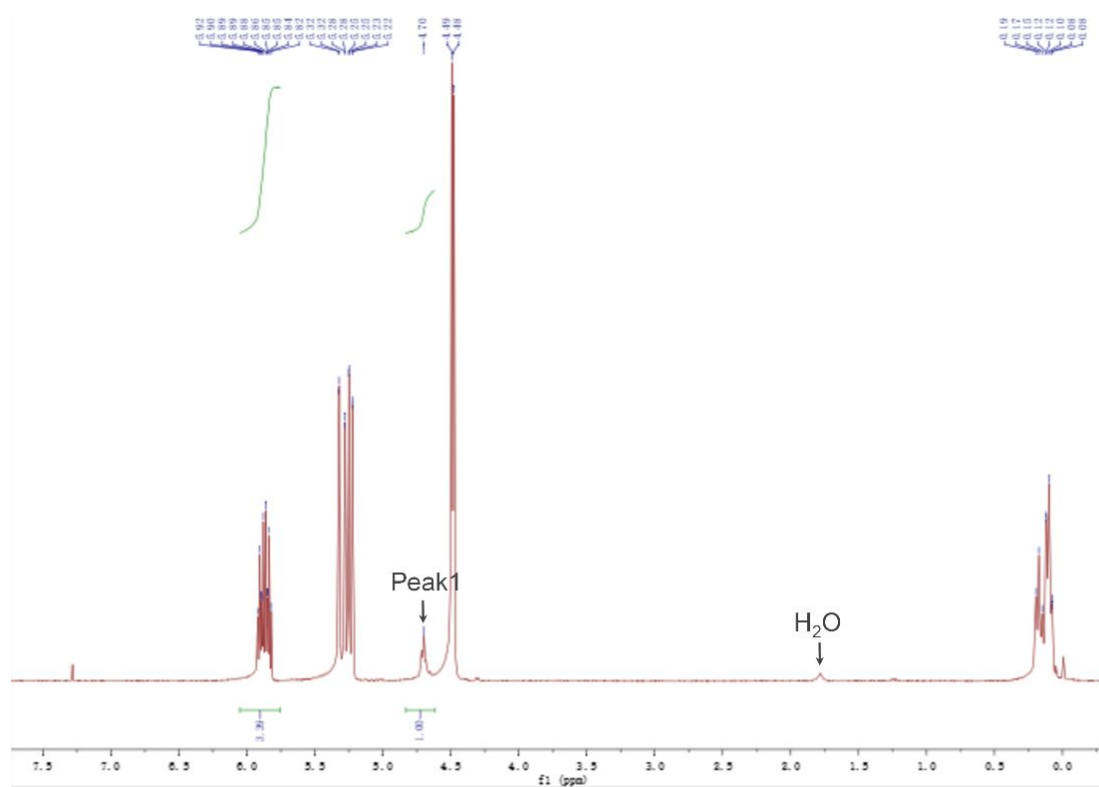

**Figure S4.**  $^1\text{H}$  NMR spectrum of TS-1.

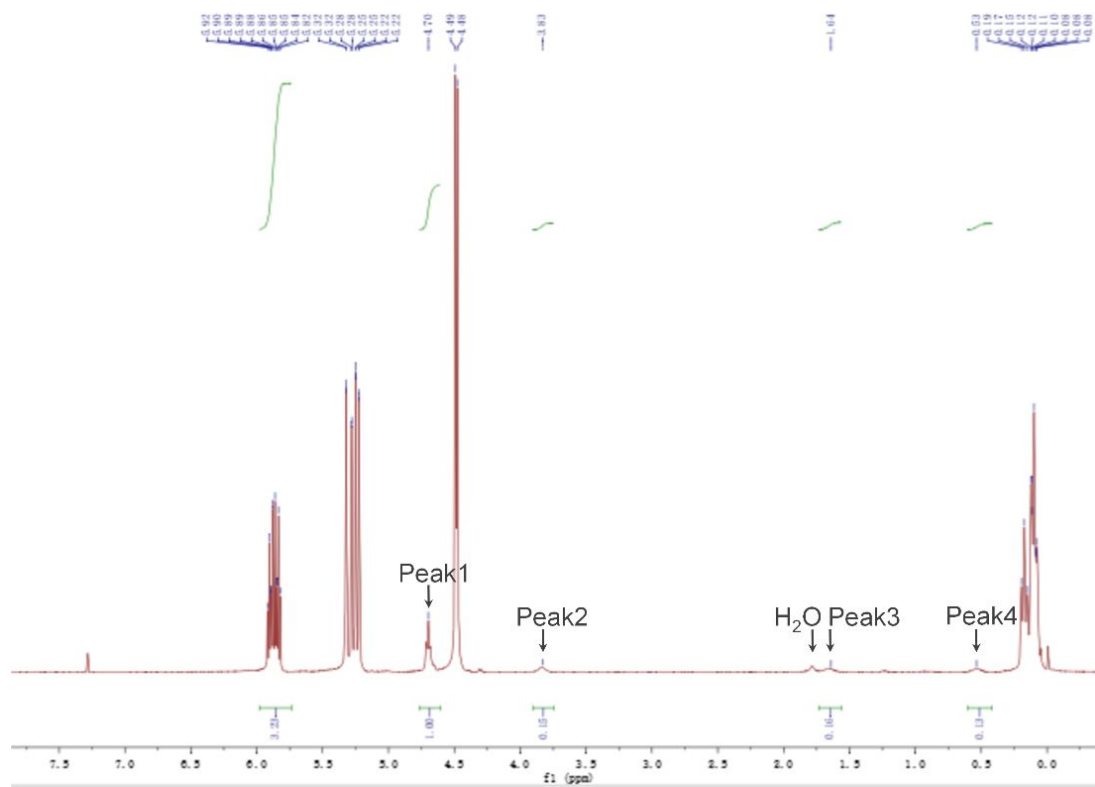

**Figure S5.** <sup>1</sup>H NMR spectrum of TS-2.

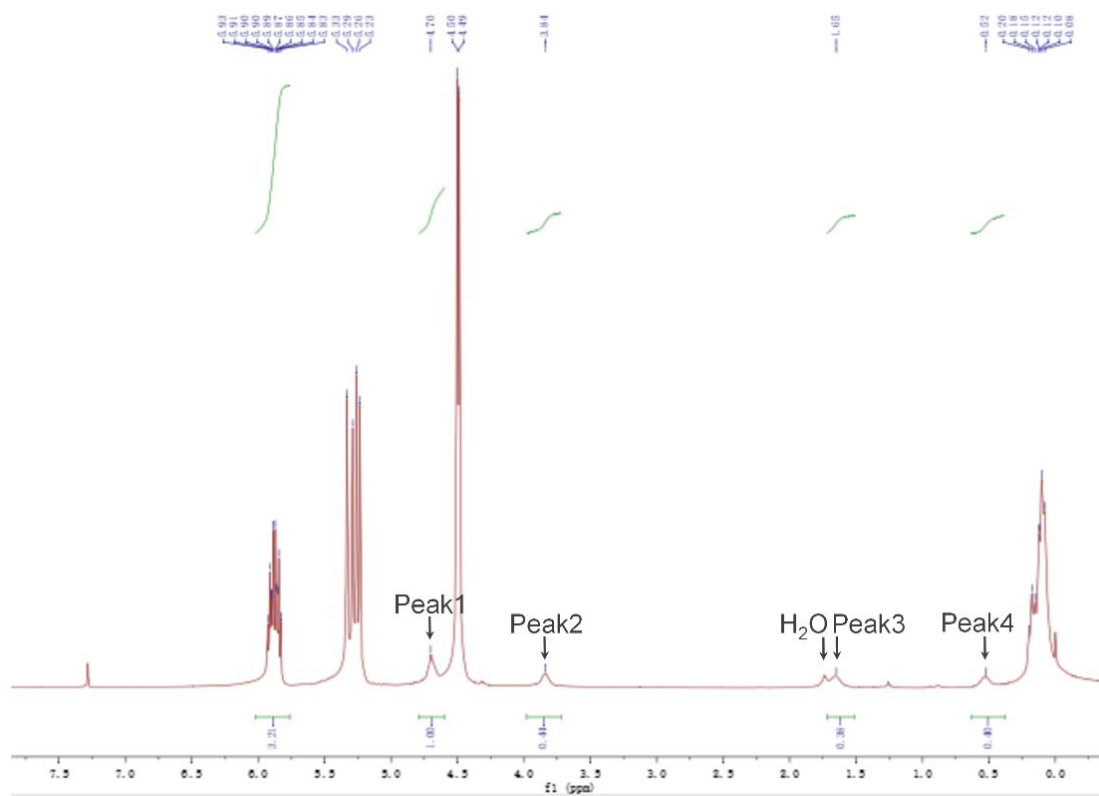

**Figure S6.**  $^1\text{H}$  NMR spectrum of TS-3.

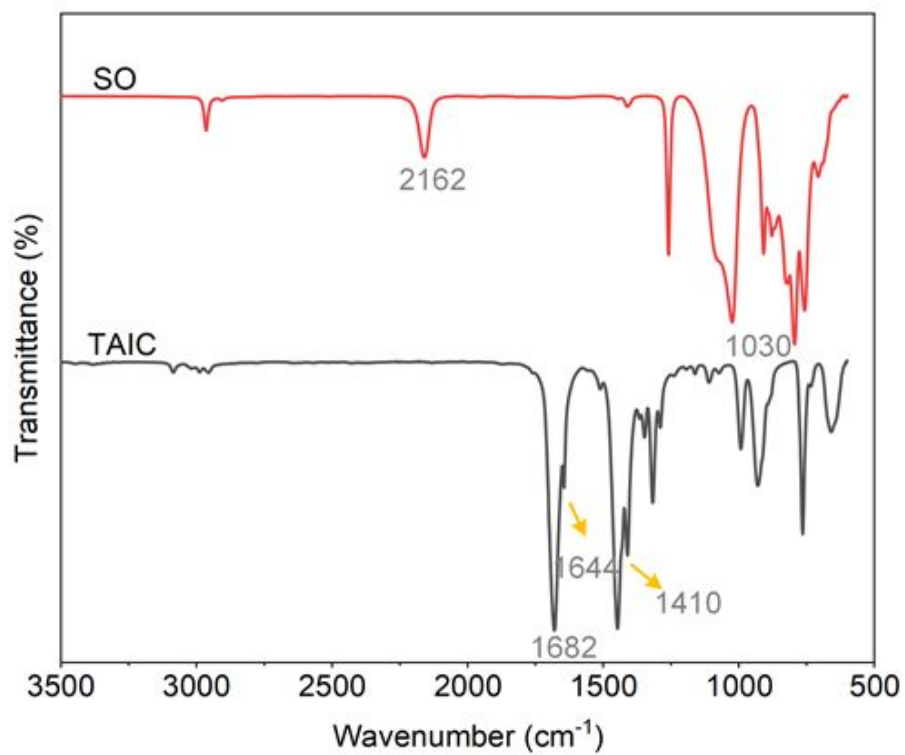

**Figure S7.** FT-IR spectra of SO and TAIC.



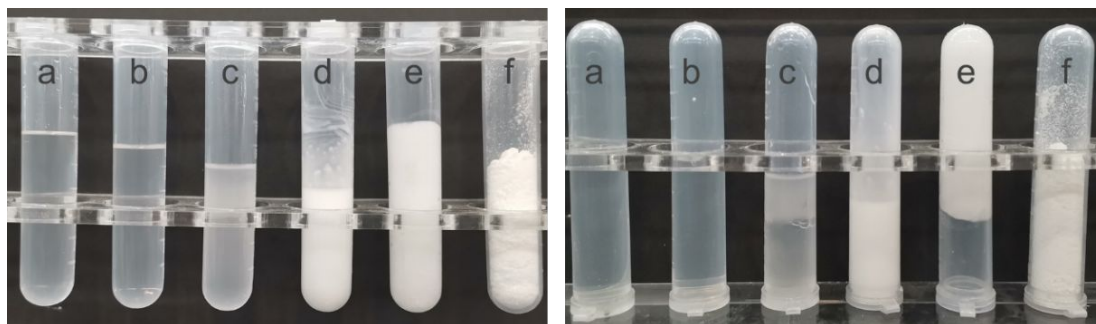

**Figure S8.** Macrographs of (a) TAIC, (b) SO, (c) TS-1, (d) TS-2, (e) TS-3 and (f) PTS at room temperature.

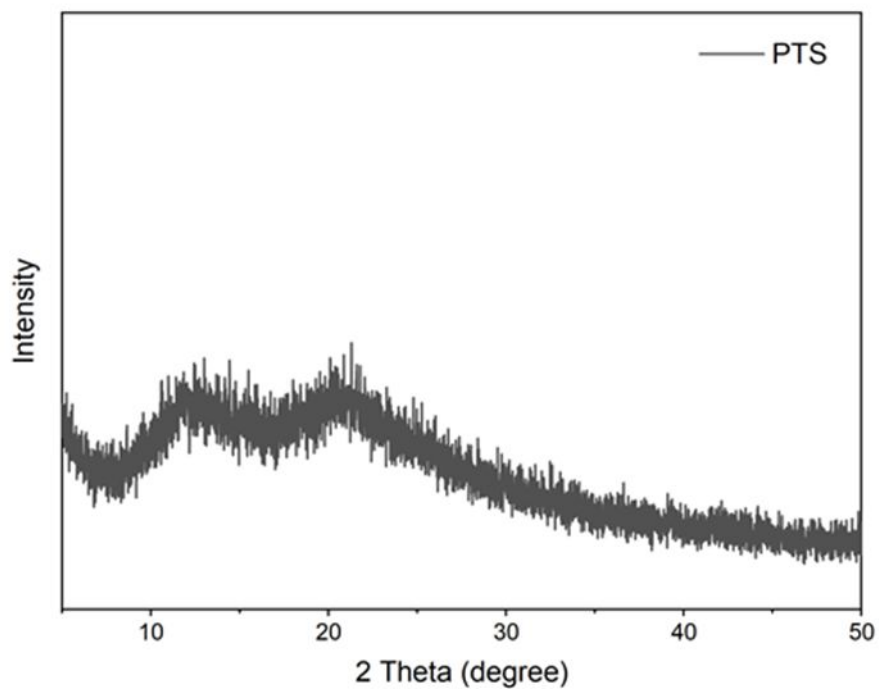

**Figure S9.** XRD pattern of PTS.

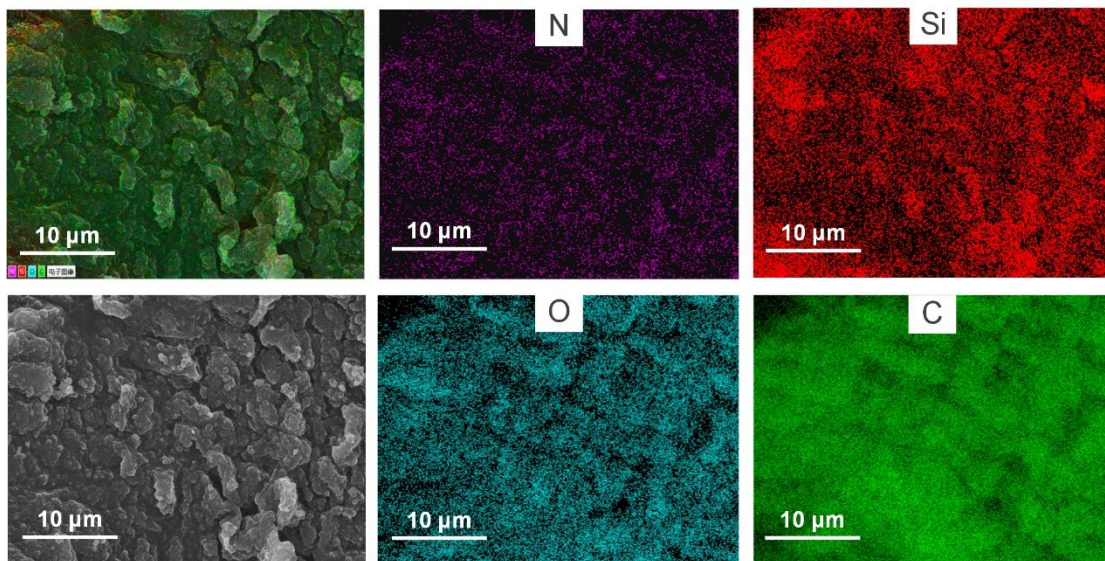

**Figure S10.** Element mappings of TSO-2.

**Table S1. Thermal Conductivity of PTS Skeleton and *n*-Octadecane**

| Substance            | Thermal Conductivity (W m <sup>-1</sup> K <sup>-1</sup> ) | Reference |
|----------------------|-----------------------------------------------------------|-----------|
| <i>n</i> -Octadecane | 0.153                                                     | (33)      |
| PTS                  | 0.166                                                     | --        |
